# Supplementary material
Source: PubMed Central journal article supplement (PMC6529654)
Supplement: IAI.00205-19-s0001.pdf [file IAI.00205-19-s0001.pdf]

## SUPPLEMENTARY DATA

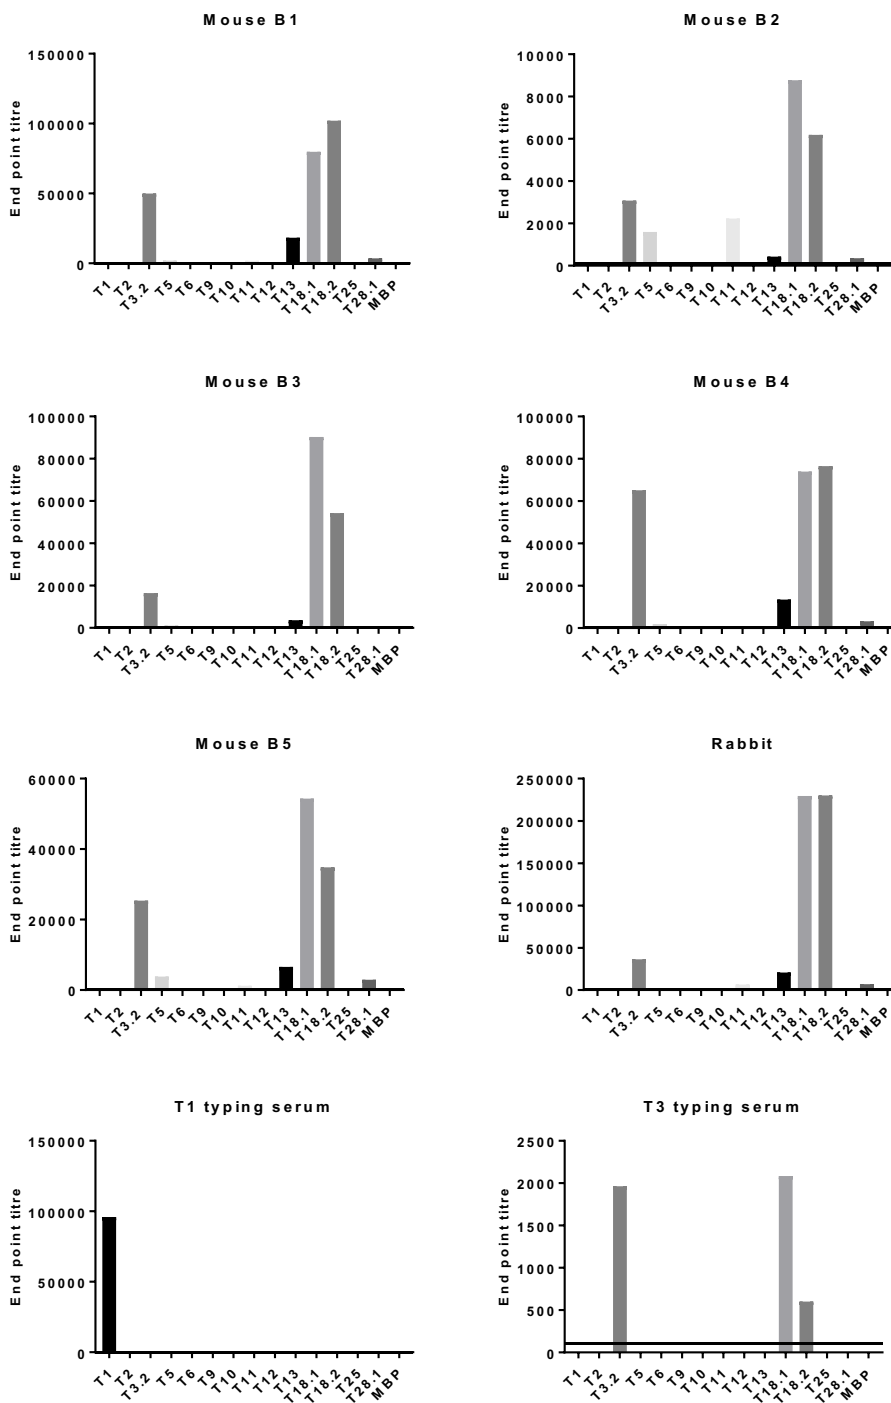

**FIG S1:** Endpoint titers of the anti-T-antigen sera to the T-antigen panel measured by ELISA. The endpoint titer was defined as the highest serum dilution above the control (absorbance of pre-immune rabbit serum +3 times the standard deviation).

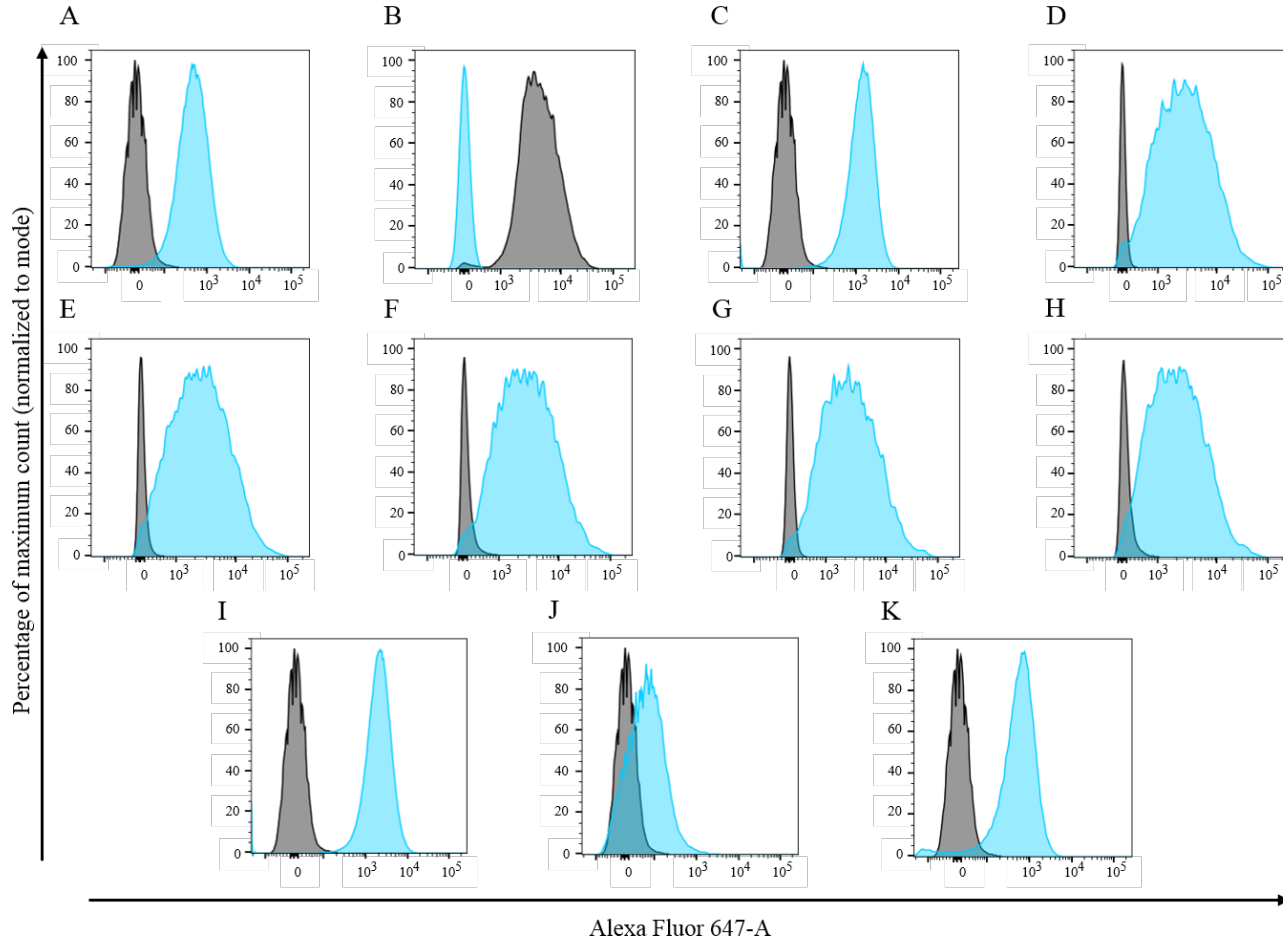

**FIG S2:** Binding of animal sera and affinity purified antibodies to the full T1 (black) and T18.1 (blue) pili expressed on the surface of *L. lactis* measured by flow cytometry. (A) T18.1 immunized rabbit (B) T1 typing serum (C) T3 typing serum (D) B1 mouse (E) B2 mouse (F) B3 mouse (G) B4 mouse (H) B5 mouse (I) T18.1 immunized rabbit serum passed over T18.1-coupled resin (J) T18.1 immunized rabbit serum passed over T3.2-coupled resin and (K) T18.1 immunized rabbit serum passed over T13-coupled resin.

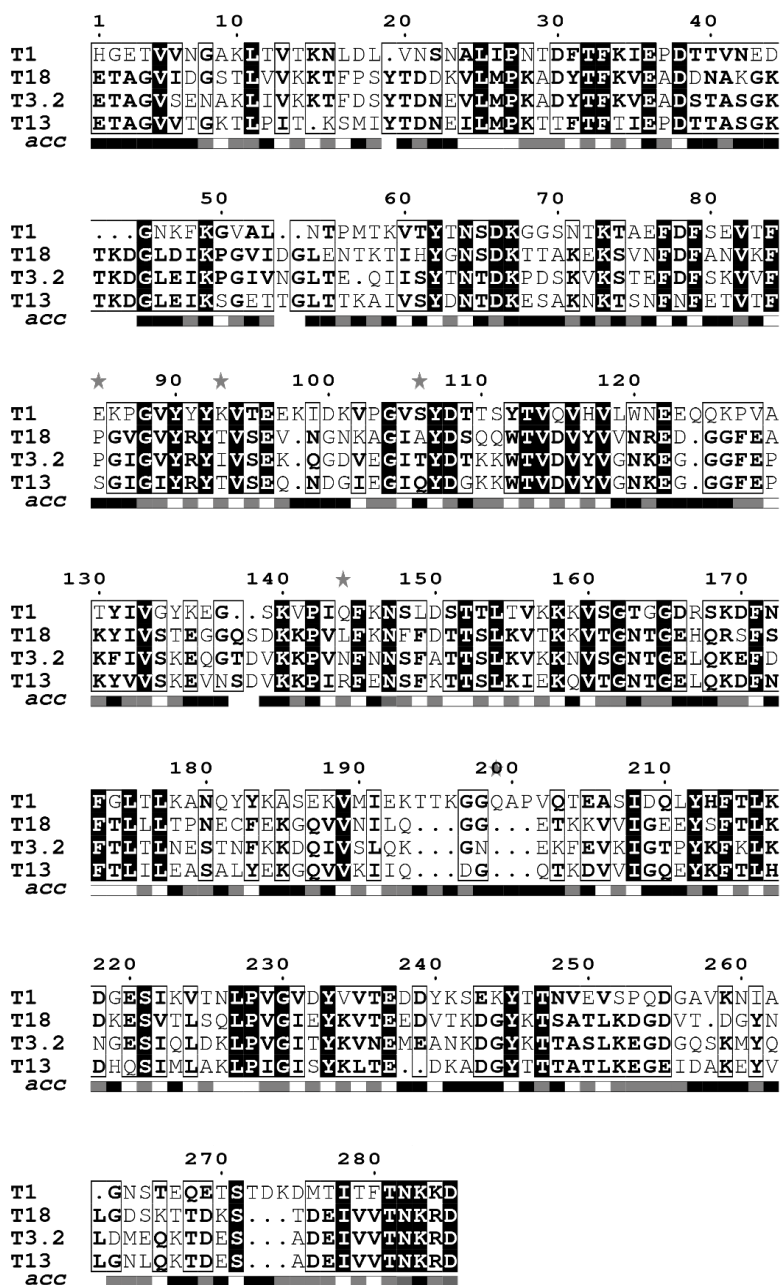

**FIG. S3** Amino acid sequence alignment of T1, T3.2, T18.1 and T18.2. The sequences in the alignment represent the mature recombinant T-antigens used in this study. The residues are numbered according to the sequence of T1 and solvent accessibility (acc), predicted from the structure of T1, is shown as a bar below the sequences. Darker shading indicates more accessible residues.

**TABLE S1.** Construct details for the T-antigens used in this study.

| Tee type | Strain No. | NCBI accession | emm type | Cloned sequence                                                                                                                                                                                                                                                                                                                                                                                                                                                                                                                                                   | Vector                                    | PCR PRIMERS                                                                                                                        | Structure PDB accession                |
|----------|------------|----------------|----------|-------------------------------------------------------------------------------------------------------------------------------------------------------------------------------------------------------------------------------------------------------------------------------------------------------------------------------------------------------------------------------------------------------------------------------------------------------------------------------------------------------------------------------------------------------------------|-------------------------------------------|------------------------------------------------------------------------------------------------------------------------------------|----------------------------------------|
| 18.1     | MGAS8232   | NP_606439.1    | emm18    | ETAGVIDGSTLVVKKTFPSYTDKVLMPKADYTFKVEADDNAKGKT<br>KDGLDIKPGVIDGLENTKTIHYGNSDKTTAKEKSNFDFANVKFPG<br>VGVYRYTVSEVNGNKAGIAYDSQQWTVDVYVNVNREDDGGFEAKYIVS<br>TEGGQSDKKPVLFKNFDTTSLKVTKKVTGNTGEHQRSFSFTLLLT<br>PNECFEKQGVNVLQGGETKKVVIGEEYSFTLKDKESVTLSQLPVG<br>IEYKVTEEDVTKDGYKTSATLKDGDVTDGYNLGDSTTDKSTDEIV<br>VTNKR                                                                                                                                                                                                                                                    | pProEX Hta<br>and<br>pProEX<br>Hta-AviTag | TEE18FWD:<br>GTATTTTCAGGGCGCC<br>GAGACAGCAGGAGTGATTGATGGTTCA<br>TEE18REV:<br>GACTGCAGGCTCTAGATTAGTCACGCT<br>TATTGTGACAACGATTTTCGTC | 6NOA<br>This<br>study                  |
| 13       | GAS131465  | KJ816975       | emm53    | ETAGVVVGKTLPIITKSMIYTDNEILMPKTTFTTIEPDTTASGKTK<br>DGLEIKSGETGLTTKAIIVSYDNTDKESAKNKTSNFNFETVTFSGI<br>GIYRYTVSEQNDGIEGIQYDGKKWTVDVYVGNKEGGGFEPKYVVS<br>EVNSDVKKPIRFENSFKTTLKIEKQVTGNTGELQKDFNFTLILEA<br>SALYEKQVVKLIQDGGTKDQVIGQYKFTLHDHQSIMLAKLPIGI<br>SYKLTEDKADGYTTTATLKEGEIDAKEYVLGNLQKTDESADIVVT<br>NKR                                                                                                                                                                                                                                                        | MBP-pProEX<br>Hta                         | M53_222FWD:<br>AAAGGCGCCGAGACGGCAGGGGTGTGA<br>AC<br>M53_222REV:<br>AAAGAATTCCTTAGTCACGCTTATTGT<br>GACAACG                          | 6BBT<br>This<br>study                  |
| 3.2      | GAS13637   | KJ816984       | emm65    | ETAGVSENAKLIVKKTFFDSYTDNEVLMKADYTFKVEADSTASGKT<br>KDGLEIKPGIVNGLTEQIISYTNTPDKPDSKVKSTEFDFSKVVFPGI<br>GVYRYIVSEKQGDVEGITYDTKKWTVDVYVGNKEGGGFEPKFIIVSK<br>EQGTDVKKPVNFNNSFATTSKLVKKNVSGNTGELQKEFDFTLTLNE<br>STNFKKDQIVSLQKGNKFEVKIGTPYKFKLKNGESIQDLKLPVGI<br>TYKVNEMANKDGYKTASLKEGDGQSKMYQLDMEQKTDESADIV<br>VTNKR                                                                                                                                                                                                                                                   | MBP-pProEX<br>Hta                         | M65104FWD:<br>AAAGGCGCCGAGACGGCAGGAGTGTC<br>G<br>M65_104REV:<br>AAAGAATTCCTTAGTCACGCTTATTGT<br>GACAACG                             | 6BBW<br>This<br>study                  |
| 1        | SF370      | NP_268517.1    | emm1     | ATTVHGETVVNGAKLTVTKNLDLVNSNALIPNTDFTFKIEPDTTVN<br>EDGNKFKGVALNTPMTKVITYTNSDKGGSNTKTAEFDFSEVTFEKP<br>VYYYKVTTEKIDKVPVGSYDTSYTVQVHVLWNEEQKPVATYIVG<br>YKEGSKVPIQFKNSLDSTLLTVKKVSGTGGDRSKDFNFGTLKAN<br>QYYKASEKVMIEKTTKGGQAPVQTEASIDQLYHFTLKDGESIKVTN<br>LPVGVYVVTEDDYKSEKYTTNVEVSPQDGAVKNIAGNSTEQETST<br>DKDMTITFTNKKFE                                                                                                                                                                                                                                             | pGEX-3c                                   | TEE1FWD:<br>CGGGATCCGCTACAACAGTTCACGG<br>TEE1REV:<br>CGGAATTCCTTATCAAGACTTTTTTA<br>TTTG                                            | 3B2M<br><i>Kang et al. 2007</i><br>(1) |
| 2        | MGAS10270  | ABF33174.1     | emm2     | EDTRVPSQTPDKTTVNIYKLGADFSKQPEGIKNENGEPIIDITKL<br>KDTFGTAVTYLPGVKFKYKVNYSSTDDVLKSIKTVEQADSKTDL<br>LDVAGAKETEATDQSGKVSIDLPSNDKVKYLFVSSNQDTVNKVVG<br>YTAVPFIHLPLVSNNGKGYDEVNVPKNTTVNEPKVDKDVTKLG<br>KDDDTYQIGDKITWFLKSTVPSNIKTLDKFGFTDNLNKLGSFIGDK<br>TQTVTKVQFGTTVLSPD TDYTVVEILDSKLTVSLTSAGIEKVSGLVA<br>SKQLITEAEKLYKAEDNTDEAAFLSVEVNAKLNADAVMGSRIENDV<br>ELDYGHESDIYKSKVPTNEVPEVHTGGARFEKVDATNQTDLQDAE<br>FGLYSNIEATEVVKWTEELLKANEAINAGKFESNTTVGTPIIFK<br>SASDGSFEIKGLRYGDDSTNTRSDGTGTAETKGTYYIKELVAP<br>KGYVVSQDIVQFDVYSSYYKDPKVTGLGTEAGDAAPTSTVKNKRP<br>SIPNTGG | pProEX Htb                                | TEE2FWD:<br>CGGGATCCGAGGACACCAGAGTGCCCT<br>CTC<br>TEE2REV:<br>CGAAGCTTTTAACCACCAGTATTAGGG<br>ATTGAAGG                              | -                                      |

|    |           |            |       |                                                                                                                                                                                                                                                                                                                                                                                                                                                                                                                                       |                   |                                                                                                          |                                      |
|----|-----------|------------|-------|---------------------------------------------------------------------------------------------------------------------------------------------------------------------------------------------------------------------------------------------------------------------------------------------------------------------------------------------------------------------------------------------------------------------------------------------------------------------------------------------------------------------------------------|-------------------|----------------------------------------------------------------------------------------------------------|--------------------------------------|
| 5  | GAS10514  | KJ816997   | emm82 | ETAGVVTGKSLQVTKTMTYDDEEVLMPETAFTFTTIEPDMTASGKEG<br>DLIDKNGIVEGLDKQVTVKYKNTDKTSQKTKIAQPFDFSKVFPFAIG<br>VYRYMVSEKNDKDDGIRYDDKKTVDVYVGNKANNEEGFEVLYIVS<br>KEGTSSTKPKIEFTNSIKTTSLSKIEKQITGNAGDRKKSFNFTLTLQ<br>PSEYYKTGSVVKIEQDGSKKDVTIGTPYKFTLGHGKSVMLSKLPIG<br>INYYLSEDEANKDGYTTTATLKEQGKEKSSDFTLSTQNQKTDESAD<br>EIVVTNKR                                                                                                                                                                                                                | pProEX Hta        | TEE5FWD:<br>AAAGGATCCTGAGACGGCAGGAGTTGT<br>AAC<br>TEE5REV:<br>AAAGAATTCTTAGTCACGCTTATTTGT<br>GACAACGAT   | Modelled                             |
| 6  | MGAS10394 | ABF33174.1 | emm2  | KDDTAQLKITNIEGGPTVTLYKIGEGVYNTNGDSFINFKYAEGVSL<br>TETGPTSQEI TTIANGINTGKIKPFSTENVSISNGTATYNARGASV<br>YIALLTGATDGRTYNPILLAASYNGEGLVTKNIDSKSNLYGQTS<br>VAKSSLPSITKKVTGTIDVNNKTTSLGSVLSYSLTFELPSYTKEA<br>VNKTVYVSDNMSEGLTFNFSNLTVEWKGKMANITEDGSMVENTKI<br>GIAKEVNNGFNLSFIYDSLESISPNI SYKAVVNNKAI VGEENPNK<br>AEFFYSNNPTKGNTYDNLDKKPKDNGITSKEDSKIYVYTYQIAFRK<br>VDSVSKTPLIGAI FGVYDTSNKLIDIVTTNKNGYAISTQVSSGKYK<br>IKELKAPKGYSLNTEYETITANVWTATVKTSANSKSTTYTSDKNKA<br>TDNSEQVGLKNGIFYSIDSRPTGNDVKEAYIESTKALTDGTTFSK<br>SNEGSGTVLLETDIPNTKL | pProEX Htb        | TEE6FWD:<br>CGGGATCCTTATCAAAGATGATACTG<br>CACAAAC<br>TEE6REV:<br>CGAAGCTTTTATCCACCTGTCGAAGGT<br>AATTCACC | 4POD<br>Young et<br>al., 2014<br>(2) |
| 9  | GAS11262  | KJ816988   | emm74 | EGGVSTGSILNVKKTFFSSYNDIEVLMFNATFTFKIQADTVKNGEKD<br>KKSGLDIKTGIMGEGLDVQIVTYTNDSPKVDKEKNVNFDFSKVEFP<br>NVGIYRYKVEEKGNAVGRYDDKTWTVDVVSENGNFIPKYIIS<br>TTTENDKKPIVFDNEFTTSLIVKKQVLGNSGDKTEGDFDFTLLLKE<br>NSLFEKQVSLIKITSDQKEEKVVTIGEKYDFKLDGEGVQLDK<br>LPIGINYQVNEKDANTNGYTTAAILEGNGTSQPYTLDSLRETDL<br>IDTITVTNKR                                                                                                                                                                                                                         | pProEX Hta        | TEE9FWD:<br>AAAGGATCCAGAAGGTGGAGTGAGTAC<br>TGG<br>TEE9REV:<br>AAAGAATTCTTAGTCACGCTTATTTGT<br>GACTGTAAT   | -                                    |
| 10 | emm89_198 | KJ817015.1 | emm89 | ETAGVVSSGQLTIKKSITNFNDTLLMPKATFTFDVDPVDVTGEEK<br>DTASGLKIQKGIAGVASQTIQYDNTDKPTNKEKAVNDFSTVTFPN<br>VGVIYRYEVSEQAGDVKGITYDSKKWTVDVVYVNNENKFTPKYIVSK<br>ETDSSKKPIVFNELKTTSLTIKKEVTGNSGDKTSDFTFTLLLKE<br>NTQFETGQVKATKKKSGAEEETVEVTIGKQYFTTLKSEELILDK<br>LPIGITYQVDETDKNKEQYETSAMTETSKEAQGYTLNLDLKTDET<br>ADTITVTNKR                                                                                                                                                                                                                      | pET101/D-<br>TOPO | TEE10TOPOF2:<br>CACCATGGAGACGGCAGGGGTTG<br>TEE10TOPOR:<br>GTTTCTCTTATTGGTAACAGTGAT                       | Modelled                             |
| 11 | GAS05151  | KJ817016   | emm89 | EVNYVKSGVIDGAKLEIHKTIKNDYDDKVLMPNVIFKFNIPDSDV<br>VAGKKEEKSGLDIKPGIVDGLTSEKVSYSYNSDKPNSKDKYTYFDF<br>SQVKFTNNGIYRYVVEEVQDTVSGIHYDSQKWYIDVYVVEGDNGFV<br>PKYIVSSKLTLETKEPVLFSNSFDTTSLVVKKEVTGNTGDKTKNFKF<br>QLLLKENAYFSAGQKVSVTITSEKASEVTTATIGQPLIFELKHNEQ<br>LKLKLPVGIYQIDETSKNSDSYTTATI QEGEQSQNSYVLNSDK<br>ETDKSPDIITVTNKR                                                                                                                                                                                                             | pProEX Hta        | TEE11FWD:<br>AAAGGCGCCGAAGTAAATATGTAAAA<br>TC<br>TEE11REV:<br>AAAGAATTCTTAGTCACGCTTATTTGT<br>GACTG       | Modelled                             |
| 12 | GAS12303  | KJ816951   | emm12 | ETAGVVSSGQLTIKKSITNFNDTLLMPKTDYTFVSNPDSAAATGTE<br>SNLPIKPGI AVNNQDIKVSYSNTDKTSGKEKQVVVDFMKVTFPSVG<br>IYRYVVTENKGTAEGVYDDTKWLVDVYVGNNEKGLLEPKYIVSKK<br>GDSATKEPIQFNNSFETTSLSKIEKEVTGNTGDHKKAFNFTLTLQPN<br>EYVEASSVVKIEENGQTKDVKIGEAYKFTLNSQSIVLSKLPVGIN<br>YKVEEAANQGGYTTTATLKDGEKLSYNYLQGEHKTDKTADEIVVT<br>NNRD                                                                                                                                                                                                                       | pProEX Hta        | TEE12FWD:<br>AAAGGATCCTGAGACGGCAGGGGTTGT<br>TAG<br>TEE12REV:<br>AAAGAATTCTTAGTCACGCTTATTTGT<br>GACAACGAT | Modelled                             |

|      |                     |          |       |                                                                                                                                                                                                                                                                                                                                                                                                                                                                                                                                                                                                                                                                                                                                                |            |                                                                                                              |          |
|------|---------------------|----------|-------|------------------------------------------------------------------------------------------------------------------------------------------------------------------------------------------------------------------------------------------------------------------------------------------------------------------------------------------------------------------------------------------------------------------------------------------------------------------------------------------------------------------------------------------------------------------------------------------------------------------------------------------------------------------------------------------------------------------------------------------------|------------|--------------------------------------------------------------------------------------------------------------|----------|
| 18.2 | NZ131<br>Spy49_0114 | ACI60465 | emm49 | ETAGVIDGSTLVVKKTFPSYTDNVLMPKADYSFKVEADDNAKGKT<br>KDGLDIKPGVIDGLENTKTIIRYSNSDKITAKEKSVNFEFANVKFPG<br>VGVYRYTVAEVNNGKAGITYDSQQWTVDVVVVNKEGGGFVVKYIVS<br>TEVVGQSEKKPVLFKNSFDTTSLKIEKQVTGNTGEHQRLFSFTLLLT<br>PNECFEKQVNVNFLQGGETKKVVIGEYSF <del>TL</del> KDKESV <del>TL</del> SQIPVG<br>IEYKLT <del>EED</del> VTKDGYKTSATLKDGEQSSTYELGKDHKTDKSADEIV<br>VTNKRDTQVPT                                                                                                                                                                                                                                                                                                                                                                                 | pProEX Hta | M49FWD:<br>AAAGCGCCGAGACAGCAGGAGTGATT<br>GATG<br>M49REV:<br>AAAGAATCCTTAAGTTGGAACCTTGAGT<br>GTCACGC          | Modelled |
| 25   | LN144               | EU725507 | emm75 | IPSSTVRAETLQDR <del>TQ</del> KTIPEATEV <del>VIT</del> KLQADDYNDV <del>KP</del> NGKAN<br>ENGLP <del>INN</del> L <del>GEL</del> GRNVKPLSDVTFVAYKIPEGIAEEKVKELKTKQT<br>VVDVENYLNAQNLKIEKTVLTKTDGNGQTTFTVQKSSYGKVFVVED<br>MTATGTPETISKAYAVPFTLELPISASDGTGYLTKVNIYPKNVTSS<br>LPKPGKDVKELGLNHSSYNI <del>GER</del> FSWFLKGTVPKNMLDYEKYSFTD<br>TLDSQLDFISVKS <del>VK</del> YGSQILEKNNDYTFSEPTAQNRTLKVELTEA<br>GIKKVAGLYPDRQEVLDTEIEAIKENTDQKPFLEVEFETNINSTVI<br>LGKPV <del>TNE</del> VKIEFDNKPDKIAKPV <del>TTP</del> SDNPEVHTGGKRFVKVAA<br>GNDATKLGGAEFDLLTEANQPINWTAELIRANNKSEYIVGTPQEGQ<br>PVK <del>LK</del> SDTDGSFEIKGLAYAIDA <del>EAT</del> GAGVKYK <del>LK</del> ETKAPAGYVIP<br>EAPIEF <del>AV</del> NQTSYNKTP <del>TT</del> IDVDKADAEPQKVENNRPE | pProEX Hta | TEE25FWD:<br>AAAGGATCCAATACCAAGTAGTACGGT<br>AAGGG<br>TEE25REV:<br>AAAGAATCCTTATTCAGGACGTTTGT<br>GTTTTCTAC    | -        |
| 28.2 | GAS11209            | KJ817028 | emm91 | ETAGV <del>TNG</del> AQLTIKKTIAN <del>YND</del> SEVLMPKAI <del>FT</del> FV <del>KP</del> DNSV <del>TG</del> VE<br>KTVDGLTIKAGIAEGLVKTGNVEYSNTDKVENKDKT <del>TT</del> FD <del>F</del> STVKF<br>PEVGVYRYTVSETDSK <del>VSG</del> IKYDTKTWIVDVVVNDGNGGFKAQYI<br>VSKEKQNDKKPVV <del>FENS</del> FKT <del>TS</del> LKVEKQVTGNTGELKKDFNFTLL<br>INPNDNFVAGQVIKLEKGGIKADV <del>KI</del> GEPYK <del>FAL</del> KNGEKV <del>TL</del> SKLP<br>VGITYSIIEDDAGKDGK <del>YK</del> TTAILKDGEQSSTYELGKNQK <del>TD</del> ESADE<br>IVVTNNRE                                                                                                                                                                                                                          | pProEX Hta | TEE28.1FWD:<br>AAAGGATCCTGAGACGGCAGGGGTAAC<br>TAA<br>TEE28.1REV:<br>AAAGAATCCTTATTCACGGTTATTTGT<br>GACAACGAT | Modelled |

## REFERENCES

1. Kang HJ, Baker EN. 2009. Intramolecular Isopeptide Bonds Give Thermodynamic and Proteolytic Stability to the Major Pilin Protein of *Streptococcus pyogenes*. *Journal of Biological Chemistry* 284:20729-20737.
2. Young PG, Moreland NJ, Loh JM, Bell A, Atatoa Carr P, Proft T, Baker EN. 2014. Structural conservation, variability, and immunogenicity of the T6 backbone pilin of serotype M6 *Streptococcus pyogenes*. *Infect Immun* 82:2949-57.
